# Supplementary material for: Specification and Classification of Pelletised Dried Sewage Sludge: Identifying Its Key Properties as a Renewable Material for Enabling Environmentally Non-Harmful Energy Utilisation
Source: MDPI journal article supplement (doi:10.3390/su142214836), 2022-11-10
Supplement: s1 [file s1]

Archive with 1 entries (1 files):
- sustainability-1986015-supplementary.pdf
